# Supplementary material for: Identification of the Group III WRKY Subfamily and the Functional Analysis of GhWRKY53 in Gossypium hirsutum L
Source: MDPI journal article supplement (doi:10.3390/plants10061235), 2021-06-17
Supplement: s1 [file s1]

>Gh\_A03G1606.1 NAME:VSR3; DESC:Vacuolar-sorting receptor 3 ; ORG:Gossypium hirsutum; CHR:A03;

MEIRRLHILLLLQGFMLFSVIGNCYARFVVEKNSLRVTSPEKIKGTYSAGNFGIPQYG  
GSMAGAVVYPKENQKGCKSFDDFGISFKSKPGALPTFVLVDRGDCFFALKVWNVQQAGA  
SAVLVADDIQEALITMDTPEEDRLAAKYIENITIPSALIEKNFGEILKKAISGGDMVNVNL  
DWRESVPHPPDDRVEYELWTNSNDECGVKCDMLMEFLKDFKGAAQILEKGGYTQFTPHYI  
TWYCPQAFSLSRQCKSQCINYGRYCAPDPEQDFSSGYEGKDVVIENLRQLCVFKVANETN  
KPWLWWDYVTDQFIRCPMKEKKYNKECADVVIRALGLDGKKIEKCMGDPNADEDNPVL  
KEEQEAQVGKSGRGDVTILPTLVVNDQYRGKLAKGAVLKAICAGFEETTEPAVCLSGDV  
ETNECLDNNGGCWQDKATNLTAACKDTFRGRVCECPLVDGVQFKGDGYSHCEASGSGRC  
KINNGGCWHEARDGHAYSACLDDGNGKCQCPPGFKGDGVKNCEDIDECKEKKACQCPE  
CCKNTWGSYECTCSGDLLYIRDHDTCSKSGTEVRSSWAAVWVILIGLAMASGGAYLIY  
KYRLRSYMDSEIRAIMAQYMPPLDSQAEVPHVSDGRA

>Gh\_A05G1816.1 NAME:APT1; DESC:Adenine phosphoribosyltransferase 1, chloroplastic ; ORG:Gossypium hirsutum; CHR:A05;

MLQRALIFSSSNPICSQLPTTAPPDNTVFPKRNGGWIIPFSSYQLPAFRFRNYRRTLLPP  
LCSGNVFDAAANRPNMASQDEQDPRISNISSAIRVIPDFPKPGIIFQDITLLLDTKAFR  
DTIDLFVERYRGKDISVVAGIEARGFIFGPPIALAIGAKFVPMRKPKNKLPGEVLSSEYSL  
EYGKDTMEMHVDVAVKAGERALIIDDLVATGGTLSAAIRLLECVGVHVVEACVIELPELK  
GRERLGGKPLFVLLSST

>Gh\_A05G2799.1 NAME:TOR1; DESC:Microtubule-associated protein TORTIFOLIA1 ; ORG:Gossypium hirsutum; CHR:A05;

MSFKNRSPTTILQPQDLKQRVYTCLNKLADRDTLAVASAELDSIARNLTADSISPFLN  
CLYGTDSSSKSPVRRQCVCLLTLLSRSHGNALSPHLSKMVSTLSRRLRDPESAVRSACVE  
ATAAMSSHITKPPFSVLSKPLIEMLVVEQDVNSQVGAAMCLAAIDAAPDPESEQLRKVL  
PKLGKLVARNESFKAKAAVFGVIGSVASVGGAGSKGVLDWLVPCAVDALSSSEDWATRKAA  
AEALGKVAMAEKELTAEFKSACVVALENKRFDKVKIVRETFNRSLDLWKEVPGVCEVSAP  
SQSDSSSVETGNGSFSGFSPVTKSVDDAGFRTLQSKKVVPSTRSPPSDASTEPTAEKETHL  
SSNYRNWNISDFSKLDRTPSDCKTEIAEPRKSLFFKAYDNIKNGDLGVMESREIGDSRD  
SRLETKRVLFAKVRDENVQKYGGKLTGSRVVPFHDENLDFDDKKAHAVEADENPKVEDL  
SLIREQLAQIEDQQSNLLNLLQKFIGSSQSGINSLETRVNGLEMALDEISYDLSLSNGRIP  
NMDSADKTCCKLPGTEFLSPKFWRKPEGRFSTSRSSSGRMLSLNAAHNIPDKDSRAETY  
IPAVSQRHQHQGCGGFIFPVADGCNGITDNGSSNRLSKNTIQNAERVQLGNGSDPDGTT  
LVRCTAPMKP

>Gh\_A06G0385.1 NAME:Dnajb13; DESC:DnaJ homolog subfamily B member 13 ; ORG:Gossypium hirsutum; CHR:A06;

MVNHLNQEPVPIFNQKKKGFSLEITRVLSWRLRLKSSSSDQPIYQPSQGSPDENGDG  
QKIVRVSSWTSDSDGSRSEGRSSKGFFKYRSMACFSRQDSTNSKGTSKRSRSPSPSPKP  
SSQNKEGSLRRSTTTDRNGLFEPLSGSTSRPNGNPIMFSNSTGVVKPPPIEKQLECTLED  
LCYGCTEKIKIKRDVITESGQRVEHKEMLSINVEPGWKKGKITFEGMGNEVPRLYAADV  
TFVIAEKQHPHIFGRDGDDLELTIEIPLVKALTGCSLPIPLLGGEKMELKIDEIHPGYEK

IIITGQGMPTTKEAASRGNLKVRFILNFPTELTDQQAQAAVRILGDSSS

>Gh\_A13G0991.1 NAME:NAGK; DESC:Acetylglutamate kinase, chloroplastic ;  
ORG:Gossypium hirsutum; CHR:A13;

MGATATGKSLHFCSSQDPLSFLSLTMTKSKAETLNLNFRFSKPPLTPNSRRLRLSIRASS  
PSSTALNDPPLPSLTNSDLQLRVRLSESLPYIQKFRGKTIVVKYGGAAAMKSAELKASVV  
RDLVLLSCVGLRPVLVHGGGPEINVLLNQLNIPAQFRDGLRVTDARTMEVVSMVLVGKVN  
KDLVSRINYAGATAVGLSGMDGRLLVARPSPNAAQLGFVGEVARVDPTVLQTIVDNGSIP  
VIASVAADEYGYQPYNNADTVAGEVAAAALGAEKLILLTDVAGILRNREDPGSLVKEIDIK  
GVKKMIEEGKVGGGMIPKVNCCIRSLDQGVTTASIIDGRVEHSLHEIMTDEGAGTMITG

>Gh\_D01G0585.1 NAME:UBQ10; DESC:Polyubiquitin 10 ; ORG:Gossypium hirsutum;  
CHR:D01;

MQIFVKTLTGKTITLEVESSDTIDNVKAKIQDKEGIPPDQQRLLIFAGKQLEDGRTLADYN  
IQKESTLHLVLRRLRGGMQIFVKTLTGKTITLEVESSDTIDNVKAKIQDKEGIPPDQQRLL  
FAGKQLEDGRTLADYNIQKESTLHLVLRRLRGGMQIFVKTLTGKTITLEVESSDTIDNVKA  
KIQDKEGIPPDQQRLLIFAGKQLEDGRTLADYNIQKESTLHLVLRRLRGGMQIFVKTLTGKT  
ITLEVESSDTIDNVKAKIQDKEGIPPDQQRLLIFAGKQLEDGRTLADYNIQKESTLHLVLR  
LRGGMQIFVKTLTGKTITLEVESSDTIDNVKAKIQDKEGIPPDQQRLLIFAGKQLEDGRTL  
ADYNIQKESTLHLVLRRLRGGMQIFVKTLTGKTITLEVESSDTIDNVKAKIQDKEGIPPDQ  
QRLIFAGKQLEDGRTLADYNIQKESTLHLVLRRLRGGFRMVF

>Gh\_D03G1692.1 NAME:dnaJ; DESC:Chaperone protein DnaJ ; ORG:Gossypium hirsutum;  
CHR:scaffold3874\_D03;

MAIIPCGSTFVAQWHIRPQLTTRSYPNIRIMTARLGVSTMSYLRASNSGLFARDSLPLL  
SFVRPSQTSIHRRGAQFIVRAETDYTYTVLGVSRNASKSEIKSAYRKLARSYHPDVNKDPG  
AETKFKEISNAYEVLSDDEKRSYDKEYGEAGLKAGMGMGDFSNPFDLFESLFEGMGGM  
GGMGMGGRSSRNRAVDGQDEYYSLVLNFKDAVFGVEKEIEITRLESCGTCNGSGAKPGTT  
PSKCTTCGGQGVQISSARTPLGVFQQVMTCCSSCGGTGEISTPCNTCSGDGRVRRTRKISLK  
VPAGVDSGSRLRVRSEGNAGRRGGSAGDLFVVIEVIPDPVLKRDDTNILYTCKVSYIDAI  
LGTTIKVPTVDGMVDLKIPAGTQPNNTLVMKKGVVPLNKTNMRGDQLVRVQVEIPKRL  
SSEKKLIEELADLSKGKTASSRR

>Gh\_D05G0050.1 NAME:RAX3; DESC:Transcription factor RAX3 ; ORG:Gossypium hirsutum;  
CHR:D05;

MGRAPCCDKANVKKGPWSPEEDAKLKAYIEQYGTGGNWIALPQKIGLKRCGKSCRLRW  
LNYLRPNKHGGFSEEDNIICSLYISIGSRWSIIAAQLPGRDNDIKNYWNTKLKKLLGR  
RKQPSNIHRLSNQDPNDPHQPTGSDDNQFSQGLSNSAMERLQLHMQLTQNPFSFYNNP  
ALWPKIHPLQEKMIGNMQASNGNPNLLMQPLLPNPQANEQSTVHQQDYPEISNTKGLE  
GLDNCLDGISPSDGSVPFGNGDNLMDSTSTAAVQQVSSFQGELDVFLNNKSSTTGGYPQ  
EDQMVNQLDCFRDINGSKDSLWPTDFDAKSASSNSWDSTSVLQSNGMFQDFELGYPM

>Gh\_D05G1532.1 NAME:AGP30; DESC:Non-classical arabinogalactan protein 30 ;  
ORG:Gossypium hirsutum; CHR:D05;

MGFAVVVLVVKAVLLVQLSLLLLSTFTVSAPIWPQASPPHYHAVSPVPPSHPPTHHHHH  
HHPHHPHHPHPTKPTPTPPPVPHPKAPVQPPTKPTTSAPPKPPVQPPTKPTKPTQP  
PPKPPTQPPTKPTKPTQSPPTKPPTHPPSHPPAKPPTSSHVAVQGVVYCKSCKYAGVDT  
LLGAKPIPRATVRLTCKDAKNELTVQFKTDKNGYFFLQAPITIYNFDLHNCVSLVSSPL  
RACSKPSNLNGGLKGAPLKPEKPSTSKKLPLYVLYSVGPFAFEPTCHK

>Gh\_D05G2725.1 NAME:DNAJ1; DESC:DnaJ protein homolog ; ORG:Gossypium hirsutum;  
CHR:D05;

MFGRAPKKSDNTKYEILGVPKTASQDDLKAYRKAANKNHPDKGGDPEKFKELAQAYE  
VLSDPEKREIYDQYGEDALKEGMMGGGGGAHDPFDIFQSFFGGNPFGGGGSSRGRRQRRG  
EDVIHPLKVSLEDLYNGTSKKLSLRNICSCKGKSGKSGASMKCSGCQGSQGMKVSIRHL  
GPSMIQQMQHPCNDCKGTGETINDKDRCPQCKGEKVVQEKKVLEVNVEKGMQNGQKIT  
FPGEADEAPDVTGDIVFVLQKDHDPKFKRKGGDLFVEHTLTLTEALCGFQFILTHLDGRQ  
LLIKTHPGEVVKPDQFKAINDEGMPMYQRPFMRGKLYIHFTVDFPDSLAEQCKALEAVL  
PPRTSVQLTDMELDECEETLYDVNIEEEMRRKQAQAAQEAYEEDDDMHGGAQRVQCA  
Q

>Gh\_D12G2323.1 DESC:B2 protein ; ORG:Gossypium hirsutum; CHR:D12;

MENNQQSFQWQFSDQLRVQNSNLANSLSNDSIWSSGYVSKRPDERRNFDIRVGGELNSVNS  
LKPKVTDNFNSFSDGKIGATSNANIGFGPIGPIGSQNNVGVNGGINKGIYSKPGNNNNN  
FNVNLKGSKNKGEDNHGTSKSKKNTNKKNNNNNDNNNENKDGKSAADKRFKTLPPSES  
LPRNETVGGYIFVCNNDTMEENLRRQLFGLPPRYRDSVRAITPGLPLFLYNYSTHQLHGVF  
EAASFSGTNIDPTAWEDKKCPGESRFPAQVRVITRKICEPLEEDSFRPILHHYDGPFRLE  
LNIPEALSLLDIFADQQDTCIS

>Gh\_D13G1239.1 NAME:NAGK; DESC:Acetylglutamate kinase, chloroplastic ;  
ORG:Gossypium hirsutum; CHR:D13;

MGATATGKSLHFCSSQDPLSFLSLTKTKSKAETLNLNFRFSKPPLTPNSRRLRLSIRASS  
PSSTALNDPPLPSLSNSDLQLRVRLSESLPYIQKFRGKTIVVKYGGGAAMKSAELKASVV  
RDLVLLSCVGLRPVLVHGGGPEINVLLNQLNIPAQFRDGLRVTDARTMEVVSMVLVGKVN  
KDLVSRINYAGATAVGLSGMDGRLLVARPSPNAAQLGFVGEVARVDPTVLQTIVDNGSIP  
VIASVADEYQPYNNADTVAGEVAAAALGAEKLILLTDVAGILRNREDPGSLVKEIDIK  
GVKKMIEEGKVGGGMIPKVNCCIRSLAQGVTTASIIDGRVEHSLHEIMTDEGAGTMITG
