# Supplementary material for: Identification of the Group III WRKY Subfamily and the Functional Analysis of GhWRKY53 in Gossypium hirsutum L
Source: MDPI journal article supplement (doi:10.3390/plants10061235), 2021-06-17
Supplement: s1 [file s1]

>Actin-2 (AT3G18780.2)

ATGGCTGAGGCTGATGATATTCAACCAATCGTGTGTGACAATGGTACCGGTATGGTGAA  
GGCTGGATTTGCAGGAGATGATGCTCCAGGGCTGTTTTTCCCAGTGTTGTTGGTAGGC  
CAAGACATCATGGTGTCTATGGTTGGGATGAACCAGAAGGATGCATATGTTGGTGATGA  
AGCACAATCCAAGAGAGGTATTCTTACCTTGAAGTATCCTATTGAGCATGGTGTGTTA  
GCAACTGGGATGATATGGAAAAGATCTGGCATCACACTTTCTACAATGAGCTTCGTATT  
GCTCCTGAAGAGCACCTGTTCTTCTTACCGAGGCTCCTCTTAACCCAAAGGCCAACA  
GAGAGAAGATGACTCAAATCATGTTTGAGACCTTTAACTCTCCCGCTATGTATGTCGCC  
ATCCAAGCTGTTCTCTCCTTGACGCCAGTGGTCGTACAACCGGTATTGTGCTGGATTCT  
TGGTGATGGTGTGTCTCACACTGTGCCAATCTACGAGGGTTTCTCTCTTCCCTCATGCCA  
TCCTCCGTCTTGACCTTGCTGGACGTGACCTTACTGATTACCTCATGAAGATCCTTACA  
GAGAGAGGTTACATGTTTACCACAACAGCAGAGCGGGAAATTGTAAGAGACATCAAG  
GAGAAGCTCTCCTTTGTTGCTGTTGACTACGAGCAGGAGATGGAAACCTCAAAGACCA  
GCTCTTCCATCGAGAAGAACTATGAATTACCCGATGGGCAAGTCATCACGATTGGTGCT  
GAGAGATTGAGATGCCCAGAAGTCTTGTTCAGCCCTCGTTTGTGGGAATGGAAGCTG  
CTGGAATCCACGAGACAACCTATAACTCAATCATGAAGTGTGATGTGGATATCAGGAAG  
GATCTGTACGGTAACATTGTGCTCAGTGGTGGAACCACTATGTTCTCAGGTATCGCTGA  
CCGTATGAGCAAAGAAATCACAGCACTTGCACCAAGCAGCATGAAGATTAAGGTCGTT  
GCACCACCTGAAAGGAAGTACAGTGTCTGGATCGGTGGTTCCATTCTTGCTTCCCTCA  
GCACATTCCAGCAGATGTGGATCTCCAAGGCCGAGTATGATGAGGCAGGTCCAGGAAT  
CGTTCACAGAAAATGTTTCTAA

>Gh\_D03G0370.1 DESC:Histone H3.3 ; ORG:Gossypium hirsutum; CHR:D03;

ATGGCCCGTACCAAGCAAACCGCCCGTAAGTCTACTGGTGGGAAGGCTCCAAGGAAG  
CAACTTGCTACCAAGGCTGCCCCGTAATCTGCCCCAACCACCGGTGGTGTGAAGAAGC  
CTCATCGATACCGTCCTGGAACGTGTGCTCTTCGTGAAATTCGTAAATACCAGAAGAGT  
ACTGAGCTTCTTATCAGGAAATTGCCTTTCCAGAGGCTTGTTTCGTGAAATTGCCCAGGA  
CTTCAAGACTGATTTGCGTTTCCAGAGCCATGCTGTTCTAGCTCTCCAGGAAGCTGCAG  
AGGCATACCTTGTTGGGTCTTTTTGAAGACACCAACCTTTGCGCGATCCATGCCAAGCGT  
GTCACAATTATGCCCAAGGACATCCAGTTGGCTCGTAGGATCAGGGGAGAGCGTGCTT  
AA
